# Supplementary material for: Efficient hydrogen isotopologues separation through a tunable potential barrier: The case of a C2N membrane
Source: PubMed Central journal article supplement (PMC5431156; doi:10.1038/s41598-017-01488-8), 2017-05-03
Supplement: 41598_2017_1488_MOESM1_ESM.pdf [file 41598_2017_1488_MOESM1_ESM.pdf]

## Supplementary material for

### Efficient hydrogen isotopologues separation through a tunable potential barrier: The case of a C<sub>2</sub>N membrane

Yuanyuan Qu<sup>a</sup>, Feng Li<sup>a,b</sup>, Mingwen Zhao<sup>a\*</sup>

<sup>a</sup> School of Physics, Shandong University, Jinan 250100, Shandong, China;

<sup>b</sup> School of Physics and Technology, University of Jinan, Jinan 250022, Shandong, China

### Supplementary Figures

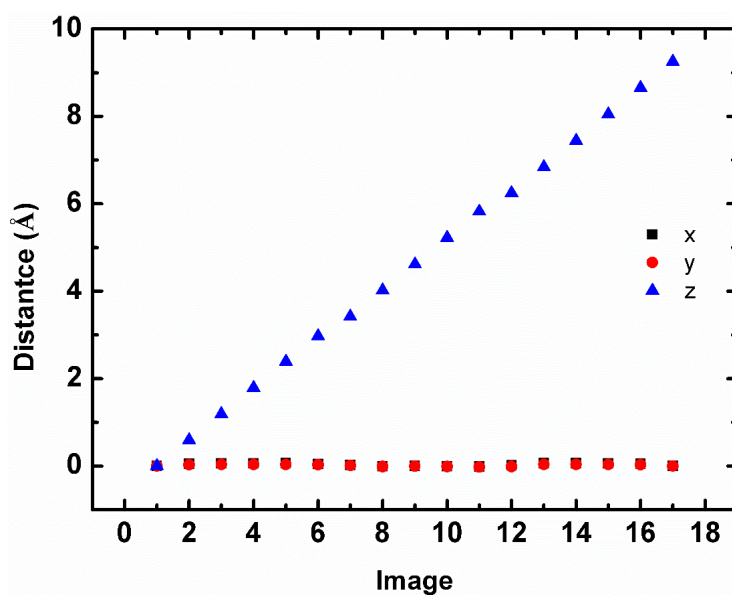

**Figure S1** The center of mass displacement of hydrogen molecule passing through the pore of C<sub>2</sub>N-h<sub>2</sub>D membrane under no strain. The parallel displacements are x, y directions and the perpendicular displacement is z direction.

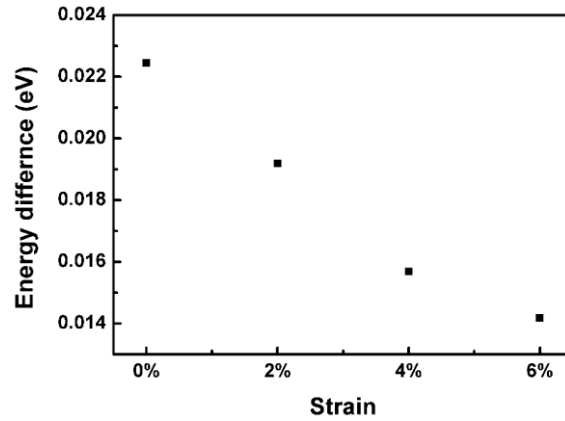

**Figure S2** The energy difference in the penetration barriers between H<sub>2</sub> and D<sub>2</sub> at the pore center after taking ZPE correction.

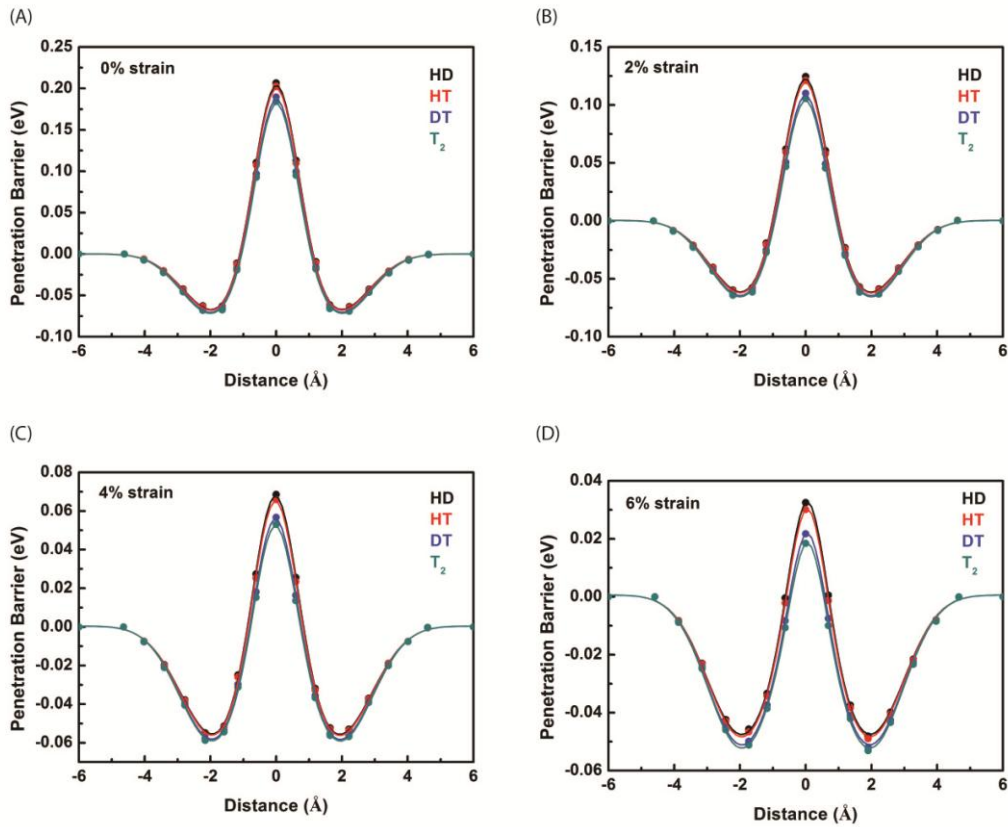

**Figure S3.** The effective energy barriers of HD, HT, DT, T<sub>2</sub> passing through C<sub>2</sub>N-h<sub>2</sub>D membrane along the perpendicular direction under different tensile strains. Colored points

indicate the results obtained by the reduced mass approximation ( $ZPE_{iso} = ZPE_{H_2} \sqrt{\frac{\mu_{H_2}}{\mu_{iso}}}$ );

while the curves show the numerically interpolated potentials.

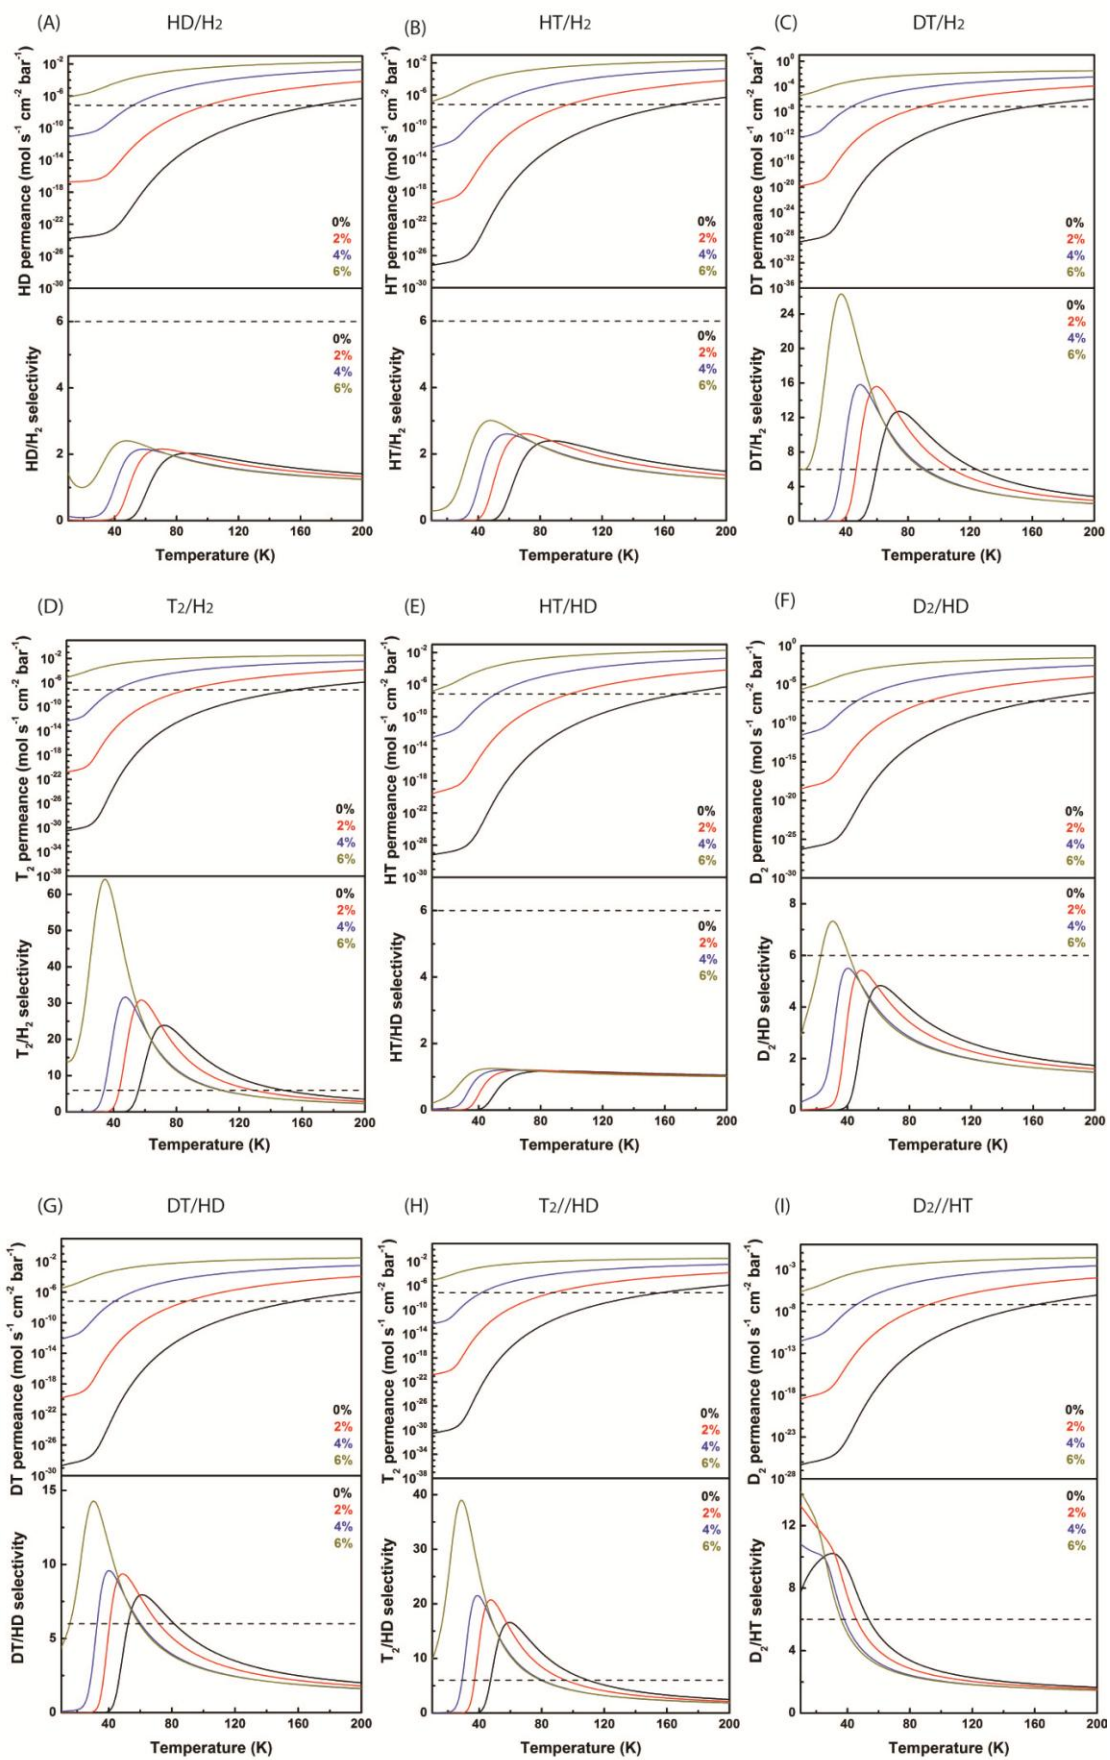

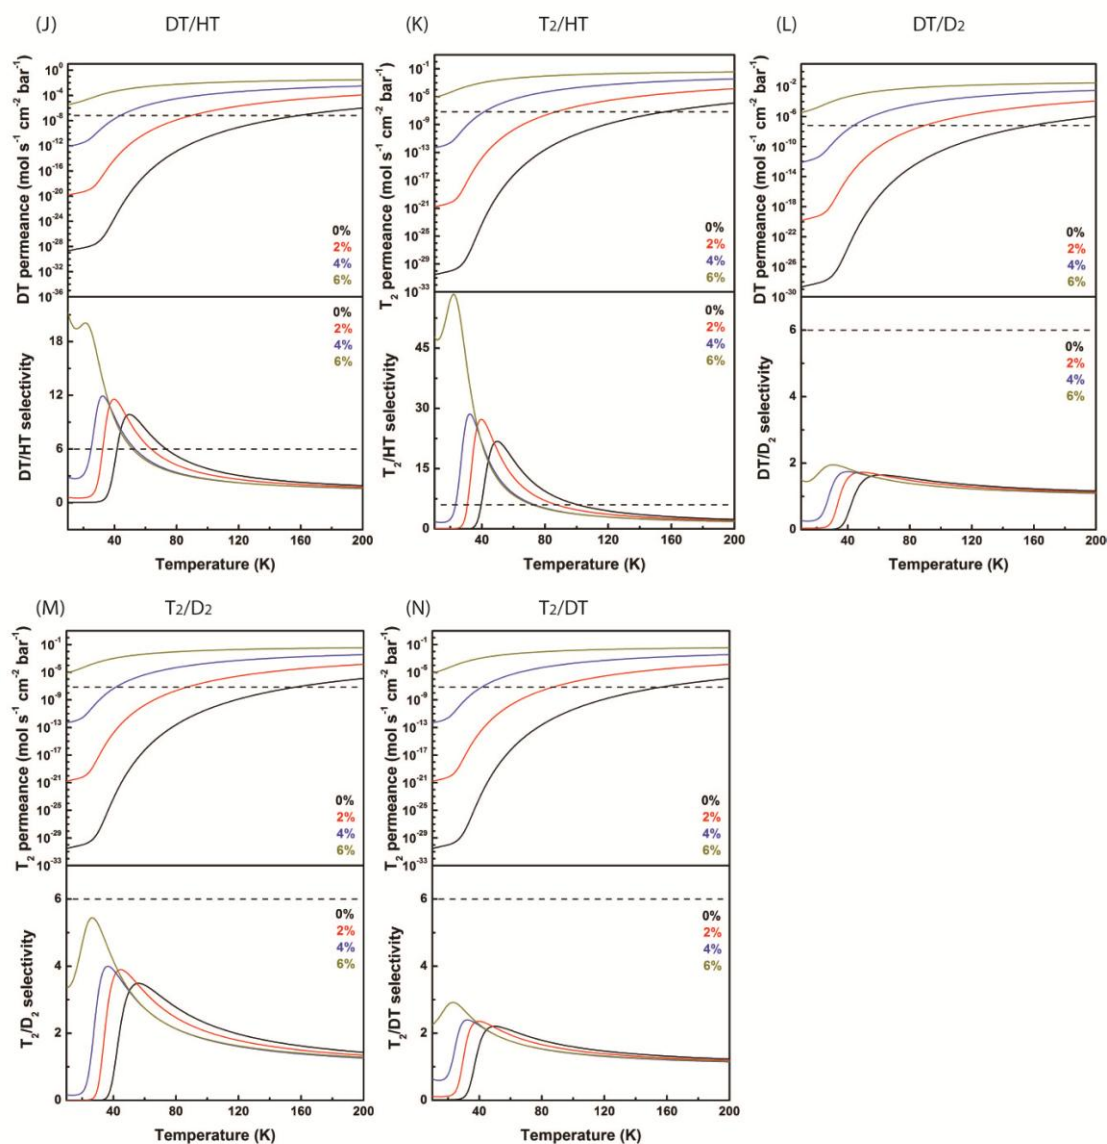

**Figure S4.** Permeance and the kinetic selectivity under different strains for temperature ranging from 10 to 200 K for difference isotopologues. Different colors indicate different strains ranging from 0% to 6%. The dashed lines indicate the industrial-acceptable values for permeance ( $6.7 \times 10^{-8}$  mol/s/cm<sup>2</sup>/bar) and selectivity (6), respectively.
